# Supplementary material
Source: PubMed Central journal article supplement (PMC4643461)

**A**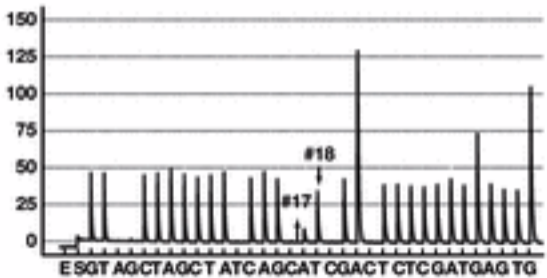**B**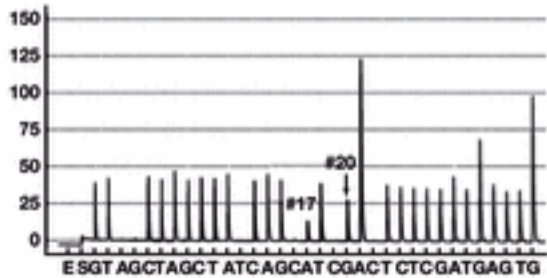

A

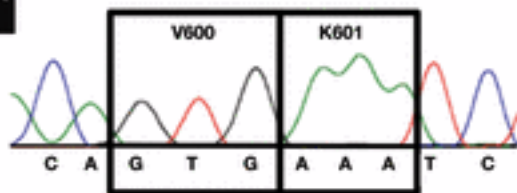

B

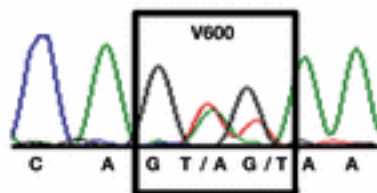

C

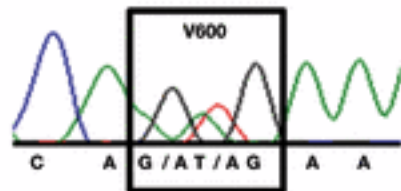

D

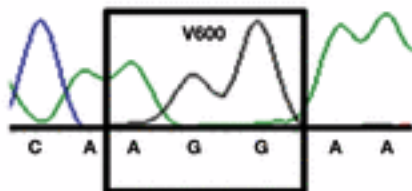

E

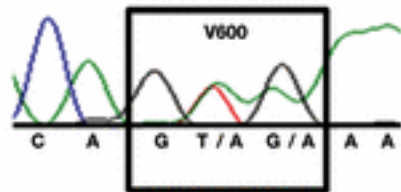

F

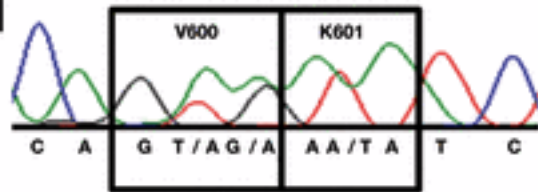

**A**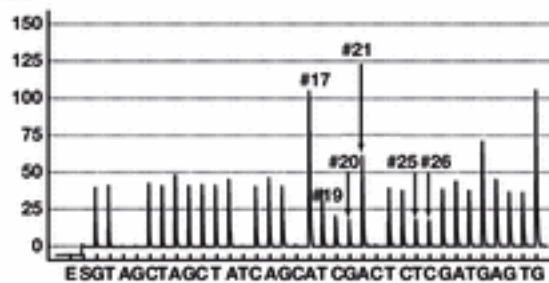**B**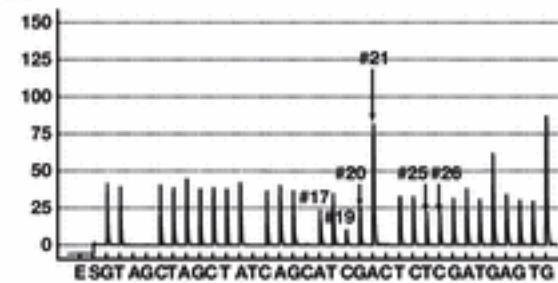**C**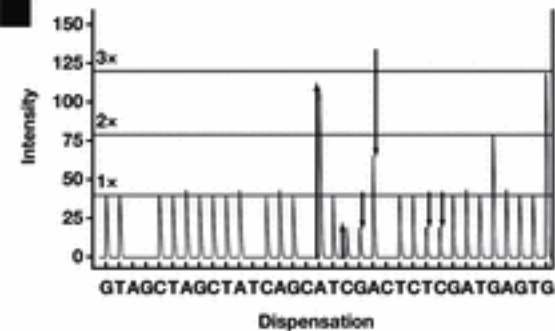**D**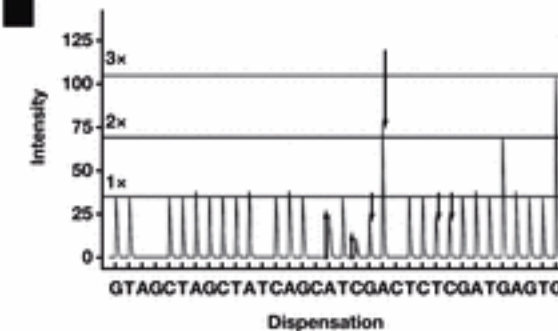

**A**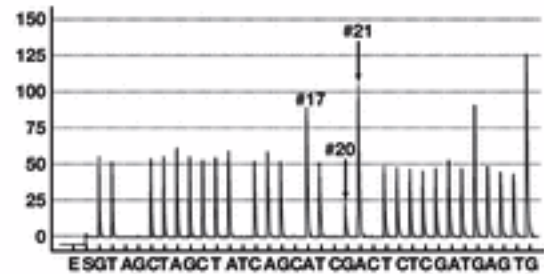**B**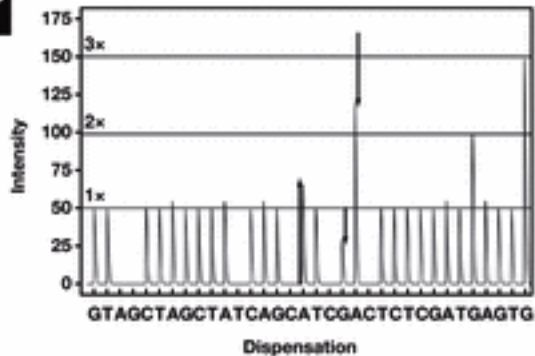

Supplement: NIHMS735656-supplement-2.pdf [file NIHMS735656-supplement-2.pdf]
